# Supplementary material
Source: PubMed Central journal article supplement (PMC2836930)
Supplement: NIHMS178508-supplement-mass_spec.pdf [file NIHMS178508-supplement-mass_spec.pdf]

Supplementary Information for Jing et al., “Self-Assembling Peptide-Polymer Hydrogels Designed From the Coiled Coil Region of Fibrin”

**Table S-1:** Peptide  $m/z$   $[M+H]^+$  measured by MALDI-TOF mass spectrometry

| Peptide                                 | Predicted | Found  |
|-----------------------------------------|-----------|--------|
| $\gamma_{49-83}$                        | 4009.5    | 4009.7 |
| $\gamma_{49-83}$ QK                     | 4119.6    | 4119.9 |
| $\gamma_{52-88}$ KI                     | 4442.2    | 4441.4 |
| Cys- $\gamma_{52-88}$ KI                | 4545.4    | 4544.6 |
| PEG- $\gamma$ KI (diblock)              | 7945      | 8142   |
| $\gamma$ KI-PEG- $\gamma$ KI (triblock) | 12489     | 12481  |
